# Supplementary material for: Functional parcellation of mouse visual cortex using statistical techniques reveals response-dependent clustering of cortical processing areas
Source: PubMed Central journal article supplement (PMC7888605; doi:10.1371/journal.pcbi.1008548), 2021-02-04
Supplement: pcbi.1008548.s008.pdf [file pcbi.1008548.s008.pdf]

| Cre-line                   | AL   | LM   | RL   | AM   | PM   | V1   |
|----------------------------|------|------|------|------|------|------|
| Slc17a7-IRES2 (Session A)  | 223  | 2184 | 97   | 138  | 1245 | 4499 |
| Slc17a7-IRES2 (Session C2) | 267  | 2140 | 70   | 149  | 1220 | 4232 |
| Rorb-IRES2 (Session A)     | 794  | 767  | 975  | 516  | 511  | 1617 |
| Rorb-IRES2 (Session C2)    | 292  | 421  | 1082 | 404  | 397  | 515  |
| Cux2-CreERT2 (Session A)   | 2219 | 1820 | 1271 | 1060 | 1624 | 3558 |
| Cux2-CreERT2 (Session C2)  | 497  | 358  | 1275 | 871  | 289  | 774  |
| Rorb-IRES2 (Session A)     | 267  | 333  | 72   | 244  | 375  | 320  |
| Rorb-IRES2 (Session C2)    | 109  | 194  | 68   | 237  | 141  | 242  |
