# Supplementary material for: Functional parcellation of mouse visual cortex using statistical techniques reveals response-dependent clustering of cortical processing areas
Source: PubMed Central journal article supplement (PMC7888605; doi:10.1371/journal.pcbi.1008548), 2021-02-04
Supplement: pcbi.1008548.s009.pdf [file pcbi.1008548.s009.pdf]

| Cre-line (Session)         | Stimuli         | Accuracy of Supervised Classifier |                     |                      |                      |
|----------------------------|-----------------|-----------------------------------|---------------------|----------------------|----------------------|
|                            |                 | GMM                               | SVM                 | ANN                  | Bayes                |
| Slc17a7-IRES2 (Session A)  | Natural Movie 1 | 58.0 ( $\pm 1.28$ )               | 65.4 ( $\pm 0.49$ ) | 65.0 ( $\pm 0.577$ ) | 57.10 ( $\pm 0.98$ ) |
|                            | Natural Movie 3 | 68.6 ( $\pm 1.44$ )               | 71.0 ( $\pm 0.26$ ) | 71.4 ( $\pm 0.13$ )  | 66.9 ( $\pm 0.82$ )  |
|                            | Resting State   | 55.9 ( $\pm 1.13$ )               | 61.2 ( $\pm 0.85$ ) | 59.9 ( $\pm 1.08$ )  | 44.6 ( $\pm 1.68$ )  |
| Slc17a7-IRES2 (Session C2) | Natural Movie 2 | 59.0 ( $\pm 1.01$ )               | 63.0 ( $\pm 0.33$ ) | 62.8 ( $\pm 0.50$ )  | 55.7 ( $\pm 0.59$ )  |
| Rorb-IRES2 (Session A)     | Natural Movie 1 | 42.2 ( $\pm 1.44$ )               | 45.2 ( $\pm 0.68$ ) | 44.9 ( $\pm 0.78$ )  | 42.0 ( $\pm 0.47$ )  |
|                            | Natural Movie 3 | 48.5 ( $\pm 1.77$ )               | 53.0 ( $\pm 0.30$ ) | 53.4 ( $\pm 0.57$ )  | 48.7 ( $\pm 0.84$ )  |
|                            | Resting State   | 65.3 ( $\pm 1.62$ )               | 67.8 ( $\pm 1.05$ ) | 68.4 ( $\pm 1.64$ )  | 63.5 ( $\pm 1.80$ )  |
| Rorb-IRES2 (Session C2)    | Natural Movie 2 | 46.8 ( $\pm 0.59$ )               | 48.3 ( $\pm 0.78$ ) | 47.6 ( $\pm 0.57$ )  | 44.6 ( $\pm 1.31$ )  |
| Cux2-CreERT2 (Session A)   | Natural Movie 1 | 37.5 ( $\pm 1.16$ )               | 43.0 ( $\pm 0.68$ ) | 43.5 ( $\pm 0.70$ )  | 39.3 ( $\pm 0.72$ )  |
|                            | Natural Movie 3 | 39.0 ( $\pm 0.82$ )               | 47.7 ( $\pm 1.27$ ) | 50.1 ( $\pm 0.93$ )  | 38.7 ( $\pm 1.09$ )  |
|                            | Resting State   | 45.8 ( $\pm 1.15$ )               | 48.6 ( $\pm 0.98$ ) | 47.3 ( $\pm 1.005$ ) | 39.2 ( $\pm 0.69$ )  |
| Cux2-CreERT2 (Session C2)  | Natural Movie 2 | 45.6 ( $\pm 1.47$ )               | 46.9 ( $\pm 1.66$ ) | 46.4 ( $\pm 1.70$ )  | 44.9 ( $\pm 1.30$ )  |
| Rbp4 (Session A)           | Natural Movie 1 | 34.6 ( $\pm 2.20$ )               | 34.6 ( $\pm 1.88$ ) | 34.5 ( $\pm 2.17$ )  | 33.1 ( $\pm 2.00$ )  |
|                            | Natural Movie 3 | 38.1 ( $\pm 2.50$ )               | 39.7 ( $\pm 2.23$ ) | 38.2 ( $\pm 2.31$ )  | 35.9 ( $\pm 2.27$ )  |
|                            | Resting State   | 35.6 ( $\pm 1.79$ )               | 41.0 ( $\pm 2.73$ ) | 39.9 ( $\pm 2.92$ )  | 33.7 ( $\pm 2.75$ )  |
| Rbp4 (Session C2)          | Natural Movie 2 | 34.0 ( $\pm 1.64$ )               | 34.2 ( $\pm 1.09$ ) | 32.5 ( $\pm 1.51$ )  | 31.4 ( $\pm 0.81$ )  |
